# Supplementary material for: A two-dimensional cobalt(ii) network with a remarkable positive axial anisotropy parameter exhibiting field-induced single-ion magnet behavior
Source: Royal Society of Chemistry journal article supplement (doi:10.1039/c6tc02234k), 2016-01-01
Supplement: c6tc02234k1.pdf [file c6tc02234k1.pdf]

## Supplementary materials for

### **A two-dimensional cobalt(II) network with the remarkable positive axial anisotropy parameter exhibiting field-induced single-ion magnet behavior**

Lin Sun,<sup>‡a</sup> Sheng Zhang,<sup>‡a,c</sup> Sanping Chen,<sup>\*a</sup> Bing Yin,<sup>\*a</sup> Yichen Sun,<sup>b</sup> Zhenxing Wang,<sup>\*b</sup> Zhongwen Ouyang,<sup>b</sup> Wenyuan Wang<sup>a</sup> and Shengli Gao<sup>a</sup>

---

<sup>a</sup>Key Laboratory of Synthetic and Natural Functional Molecule Chemistry of Ministry of Education, College of Chemistry and Materials Science, Northwest University, Xi'an, Shaanxi 710069, PR China. \*E-mail: [sanpinachen@126.com](mailto:sanpinachen@126.com); [rayinyin@nwu.edu.cn](mailto:rayinyin@nwu.edu.cn)

<sup>b</sup>Wuhan National High Magnetic Field Center, Huazhong University of Science and Technology, Wuhan 430074, China. \*E-mail: [zxwang@hust.edu.cn](mailto:zxwang@hust.edu.cn)

<sup>c</sup>College of Chemistry and Chemical Engineering, Baoji University of Arts and Sciences, Baoji 721013, China

<sup>‡</sup> These authors have equal contribution to this work.

Table S1 Crystallographic Data for **1** and **2**.

| Compound                                            | <b>1</b>                                                                        | <b>2</b>                                                                        |
|-----------------------------------------------------|---------------------------------------------------------------------------------|---------------------------------------------------------------------------------|
| Empirical formula                                   | C <sub>26</sub> H <sub>22</sub> CoS <sub>2</sub> N <sub>12</sub> O <sub>2</sub> | C <sub>26</sub> H <sub>22</sub> NiS <sub>2</sub> N <sub>12</sub> O <sub>2</sub> |
| Formula weight                                      | 657.61                                                                          | 657.39                                                                          |
| Temperature                                         | 296(2) K                                                                        | 296 K                                                                           |
| Crystal system                                      | Orthorhombic                                                                    | Orthorhombic                                                                    |
| space group                                         | <i>Pca</i> 2 <sub>1</sub>                                                       | <i>Pca</i> 2 <sub>1</sub>                                                       |
| <i>a</i> (Å)                                        | 17.246(7)                                                                       | 17.119(2)                                                                       |
| <i>b</i> (Å)                                        | 9.876(4)                                                                        | 9.8597(13)                                                                      |
| <i>c</i> (Å)                                        | 16.480(7)                                                                       | 16.463(2)                                                                       |
| $\alpha$ (°)                                        | 90                                                                              | 90                                                                              |
| $\beta$ (°)                                         | 90                                                                              | 90                                                                              |
| $\gamma$ (°)                                        | 90                                                                              | 90                                                                              |
| <i>V</i> (Å <sup>3</sup> )                          | 2806.9(19)                                                                      | 2791.8(7)                                                                       |
| <i>Z</i>                                            | 4                                                                               | 4                                                                               |
| F(000)                                              | 1348.0                                                                          | 1352.0                                                                          |
| Goodness-of-fit on F <sup>2</sup>                   | 0.913                                                                           | 1.049                                                                           |
| Final <i>R</i> indices [ <i>I</i> > 2σ( <i>I</i> )] | <i>R</i> 1 = 0.0923<br><i>wR</i> <sub>2</sub> = 0.2039                          | <i>R</i> 1 = 0.0460<br><i>wR</i> <sub>2</sub> = 0.1173                          |
| <i>R</i> indices (all data)                         | <i>R</i> 1 = 0.1992<br><i>wR</i> <sub>2</sub> = 0.2491                          | <i>R</i> 1 = 0.0605<br><i>wR</i> <sub>2</sub> = 0.1279                          |
| CCDC                                                | 1458082                                                                         | 1456495                                                                         |

Table S2 Selected bond lengths (Å) and angles (°) for **1** and **2**.

| <b>1</b>                                              |           |                    |            |
|-------------------------------------------------------|-----------|--------------------|------------|
| Co(1)-N(1)                                            | 2.226(11) | N(11)-Co(1)-N(12)  | 178.3(5)   |
| Co(1)-N(5A)                                           | 2.212(10) | N(11)-Co(1)-N(6)   | 87.7(5)    |
| Co(1)-N(6)                                            | 2.181(12) | N(12)-Co(1)-N(6)   | 91.3(4)    |
| Co(1)-N(10B)                                          | 2.219(10) | N(11)-Co(1)-N(6)   | 91.3(4)    |
| Co(1)-N(11)                                           | 2.059(12) | N(11)-Co(1)-N(5A)  | 88.5(4)    |
| Co(1)-N(12)                                           | 2.076(12) | N(12)-Co(1)-N(5A)  | 90.1(5)    |
| N(11)-Co(1)-N(10B)                                    | 91.6(4)   | N(6)-Co(1)-N(5A)   | 87.5(4)    |
| N(5A)-Co(1)-N(10B)                                    | 179.2(5)  | N(12)-Co(1)-N(10B) | 89.8(4)    |
| N(11)-Co(1)-N(1)                                      | 93.0(5)   | N(6)-Co(1)-N(10B)  | 91.7(4)    |
| N(12)-Co(1)-N(1)                                      | 88.0(4)   | N(6)-Co(1)-N(1)    | 178.4(5)   |
| N(10B)-Co(1)-N(1)                                     | 89.7(4)   | N(5A)-Co(1)-N(1)   | 91.1(4)    |
| Symmetry codes: A = -0.5+x, 1-y, z; B = 0.5+x, 2-y, z |           |                    |            |
| <b>2</b>                                              |           |                    |            |
| Ni(1)-N(1)                                            | 2.170(4)  | N(11)-Ni(1)-N(12)  | 178.3(5)   |
| Ni(1)-N(6)                                            | 2.167(4)  | N(12)-Ni(1)-N(5C)  | 88.24(15)  |
| Ni(1)-N(11)                                           | 2.030(4)  | N(6)-Ni(1)-N(5C)   | 89.00(14)  |
| Ni(1)-N(12)                                           | 2.036(4)  | N(11)-Ni(1)-N(1)   | 89.20(17)  |
| Ni(1)-N(5C)                                           | 2.171(4)  | N(12)-Ni(1)-N(1)   | 89.86(16)  |
| Ni(1)-N(10D)                                          | 2.176(4)  | N(6)-Ni(1)-N(1)    | 178.56(16) |
| N(5C)-Ni(1)-N(1)                                      | 91.32(15) | N(11)-Ni(1)-N(10D) | 89.47(16)  |
| N(11)-Ni(1)-N(12)                                     | 178.8(2)  | N(12)-Ni(1)-N(10D) | 91.18(15)  |
| N(11)-Ni(1)-N(6)                                      | 92.20(16) | N(6)-Ni(1)-N(10D)  | 91.38(15)  |
| N(12)-Ni(1)-N(6)                                      | 88.74(16) | N(5C)-Ni(1)-N(10D) | 179.30(18) |
| N(11)-Ni(1)-N(5C)                                     | 91.10(16) | N(1)-Ni(1)-N(10D)  | 88.29(15)  |
| Symmetry codes: C = 0.5+x, 1-y, z; D = -0.5+x, -y, z  |           |                    |            |

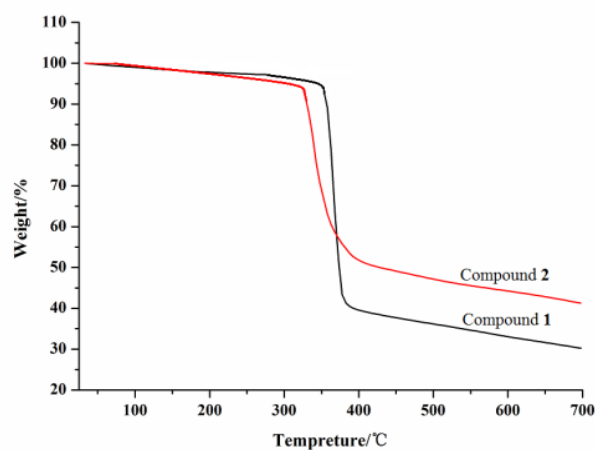

Fig. S1 TGA curves of **1** (black) and **2** (red) under dry N<sub>2</sub> atmosphere.

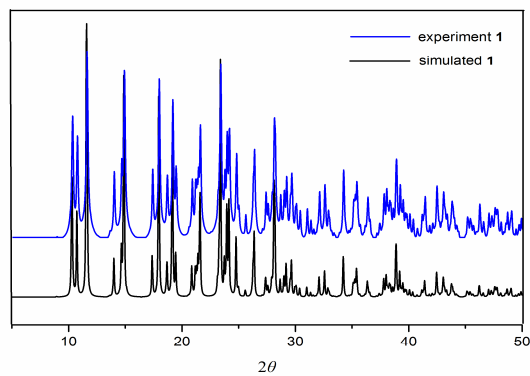

Fig. S2 Experimental XRPD and calculated XRPD of  $\{[\text{Co}(3,3'\text{-Hbpt})_2(\text{SCN})_2]\cdot 2\text{H}_2\text{O}\}_n$  (**1**).

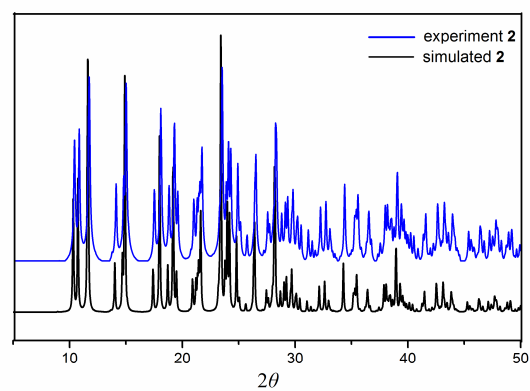

Fig. S3 Experimental XRPD and calculated XRPD of  $\{[\text{Ni}(3,3'\text{-Hbpt})_2(\text{SCN})_2]\cdot 2\text{H}_2\text{O}\}_n$  (**2**).

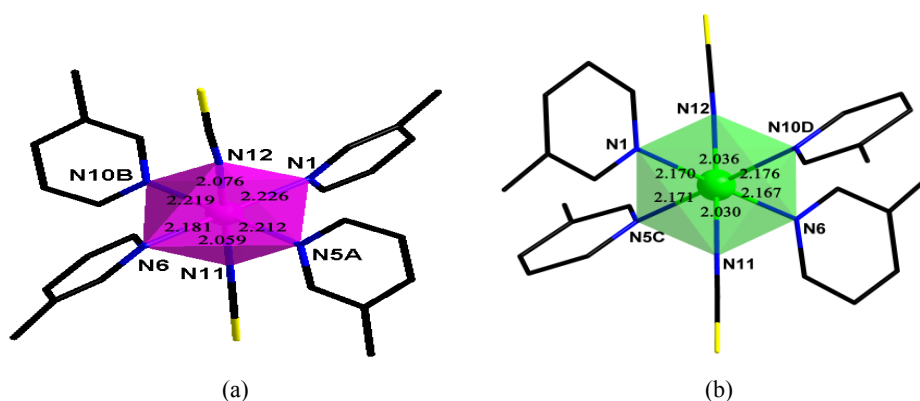

Fig. S4 View of the metal coordination polyhedron of **1** and **2** showing the tetragonally distorted geometry of the metal atoms. Cobalt, nickel and nitrogen atoms are represented with purple, green and blue colors, respectively.

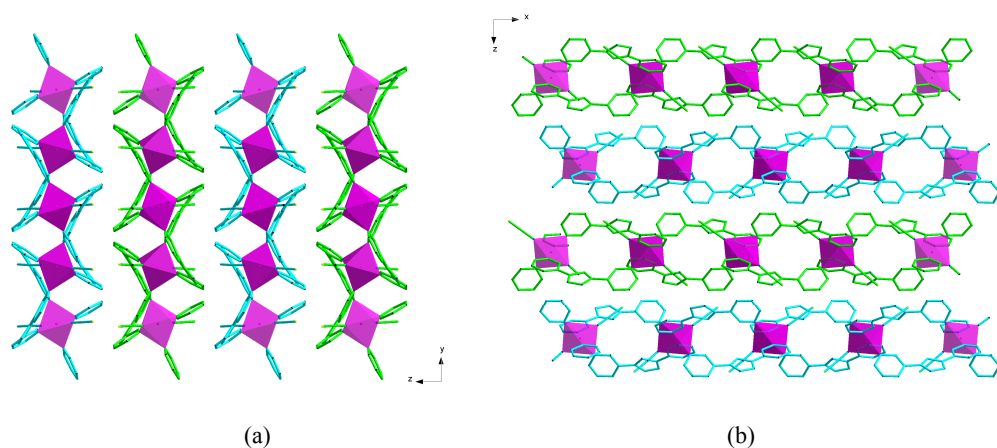

**Fig. S5** View of the 3D framework along the  $x$  axis (a) and  $y$  axis (b). The  $\text{H}_2\text{O}$  guests are omitted.

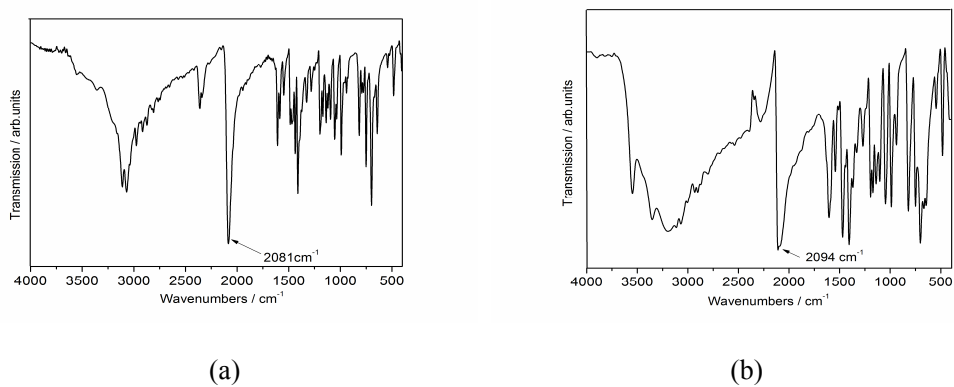

**Fig. S6** IR spectrum for **1** and **2**.

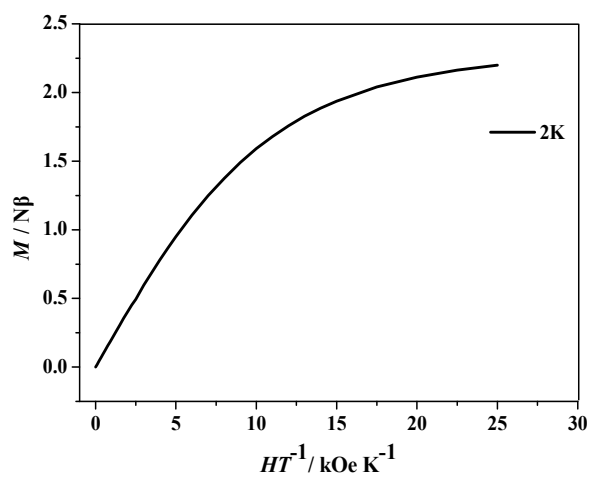

**Fig. S7** Experimental  $M$  versus  $H/T$  plots of **2**.

Table S3 The contributions of the components of the ground Quartet spin eigenstates in the ground (KD<sub>0</sub>) and first excited Kramers doublets (KD<sub>1</sub>) of (%)<sup>a</sup>

|            |                        | KD <sub>0</sub> -1       | KD <sub>0</sub> -2 | KD <sub>1</sub> -1 | KD <sub>1</sub> -2 |
|------------|------------------------|--------------------------|--------------------|--------------------|--------------------|
| <b>1</b>   | $ +\frac{1}{2}\rangle$ | 60.61/64.33 <sup>b</sup> | /                  | 2.76/3.15          | 2.40/2.74          |
|            | $ -\frac{1}{2}\rangle$ | /                        | 60.61/64.33        | 2.40/2.74          | 2.76/3.15          |
|            | $ +\frac{3}{2}\rangle$ | 2.75/3.30                | 1.24/1.37          | /                  | 80.48/82.50        |
|            | $ -\frac{3}{2}\rangle$ | 1.24/1.37                | 2.75/3.30          | 80.48/82.50        | /                  |
| <b>1'</b>  | $ +\frac{1}{2}\rangle$ | 60.78/65.62              | /                  | 2.69/2.93          | 2.20/2.42          |
|            | $ -\frac{1}{2}\rangle$ | /                        | 60.78/65.62        | 2.20/2.42          | 2.69/2.93          |
|            | $ +\frac{3}{2}\rangle$ | 2.53/2.74                | 1.24/1.46          | /                  | 80.82/83.54        |
|            | $ -\frac{3}{2}\rangle$ | 1.24/1.46                | 2.53/2.74          | 80.82/83.54        | /                  |
| <b>1''</b> | $ +\frac{1}{2}\rangle$ | 58.84/63.45              | 2.14/2.41          | 2.80/3.08          | 1.45/1.48          |
|            | $ -\frac{1}{2}\rangle$ | 2.14/2.41                | 58.84/63.45        | 1.45/1.48          | 2.80/3.08          |
|            | $ +\frac{3}{2}\rangle$ | 1.90/2.06                | 1.19/1.34          | /                  | 81.32/84.12        |
|            | $ -\frac{3}{2}\rangle$ | 1.19/1.34                | 1.90/2.06          | 81.32/84.12        | /                  |

<sup>a</sup> only the contributions larger than 1% are shown here; <sup>b</sup> The results from CASSCF are at the left side of “/” and the results from NEVPT2 are at the right side of “/”.

Table S4 The contributions of 5 metal 3d orbitals to the active orbitals of CASSCF wavefunction (%).

|          | $d_{z^2}$ | $d_{xz}$ | $d_{yz}$ | $d_{xy}$ | $d_{x^2-y^2}$ |
|----------|-----------|----------|----------|----------|---------------|
| $\phi_1$ | 2.3       | 2.4      | 29.5     | 27.6     | 37.1          |
| $\phi_2$ | 13.9      | 25.6     | 1.8      | 50.2     | 7.3           |
| $\phi_3$ | 75.0      | 21.2     | 0.0      | 0.5      | 2.2           |
| $\phi_4$ | 6.9       | 47.8     | 6.1      | 18.9     | 15.7          |
| $\phi_5$ | 0.5       | 0.1      | 58.3     | 1.0      | 34.4          |

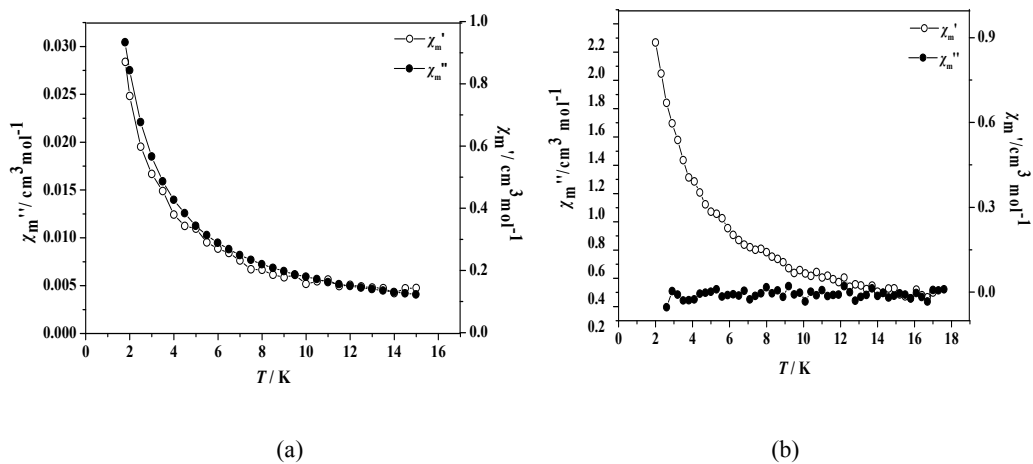

Fig. S8 Temperature dependence of the in-phase and out-of phase ac susceptibility signals for 1 and 2 under 00Ee dc field.

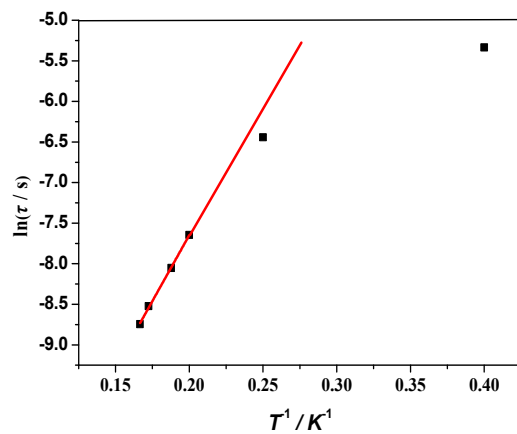

Fig. S9 Magnetization relaxation time,  $\ln\tau$  vs.  $T^{-1}$  plot under 1.5 kOe dc field for 1. The solid line is fitted with the Arrhenius law.

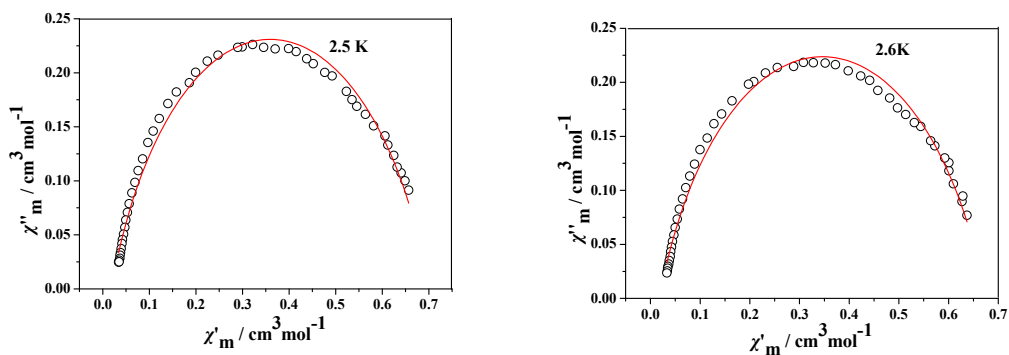

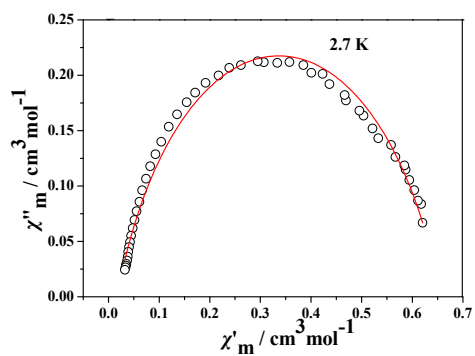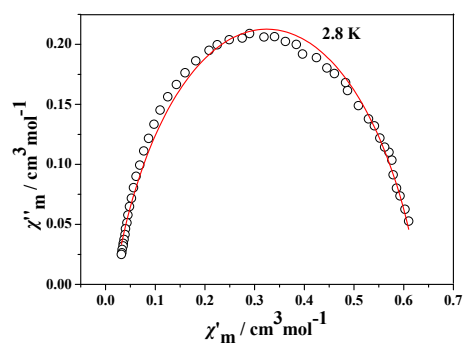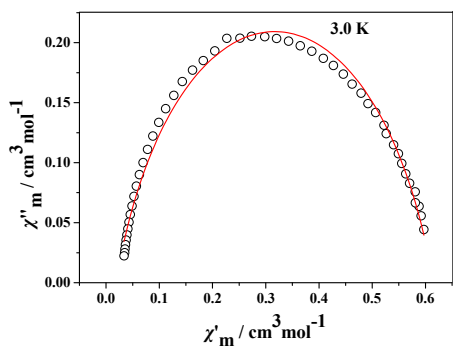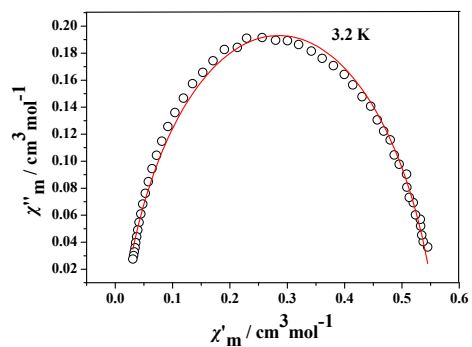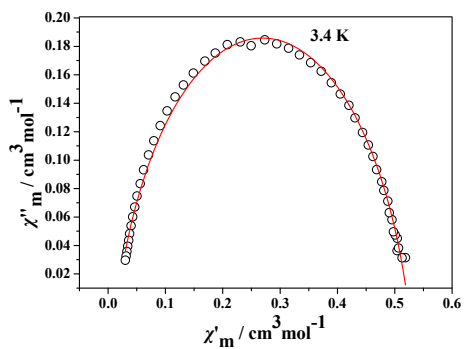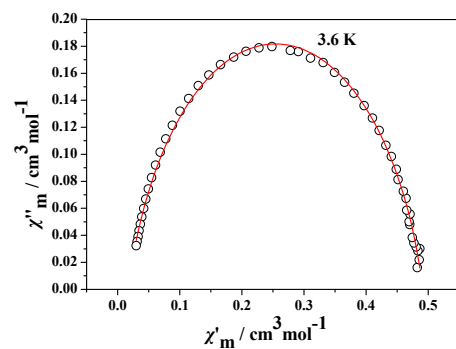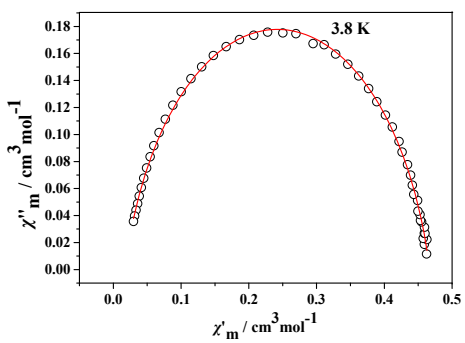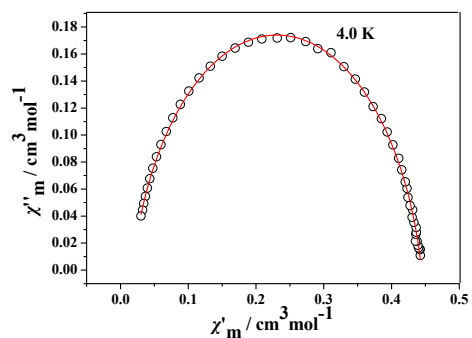



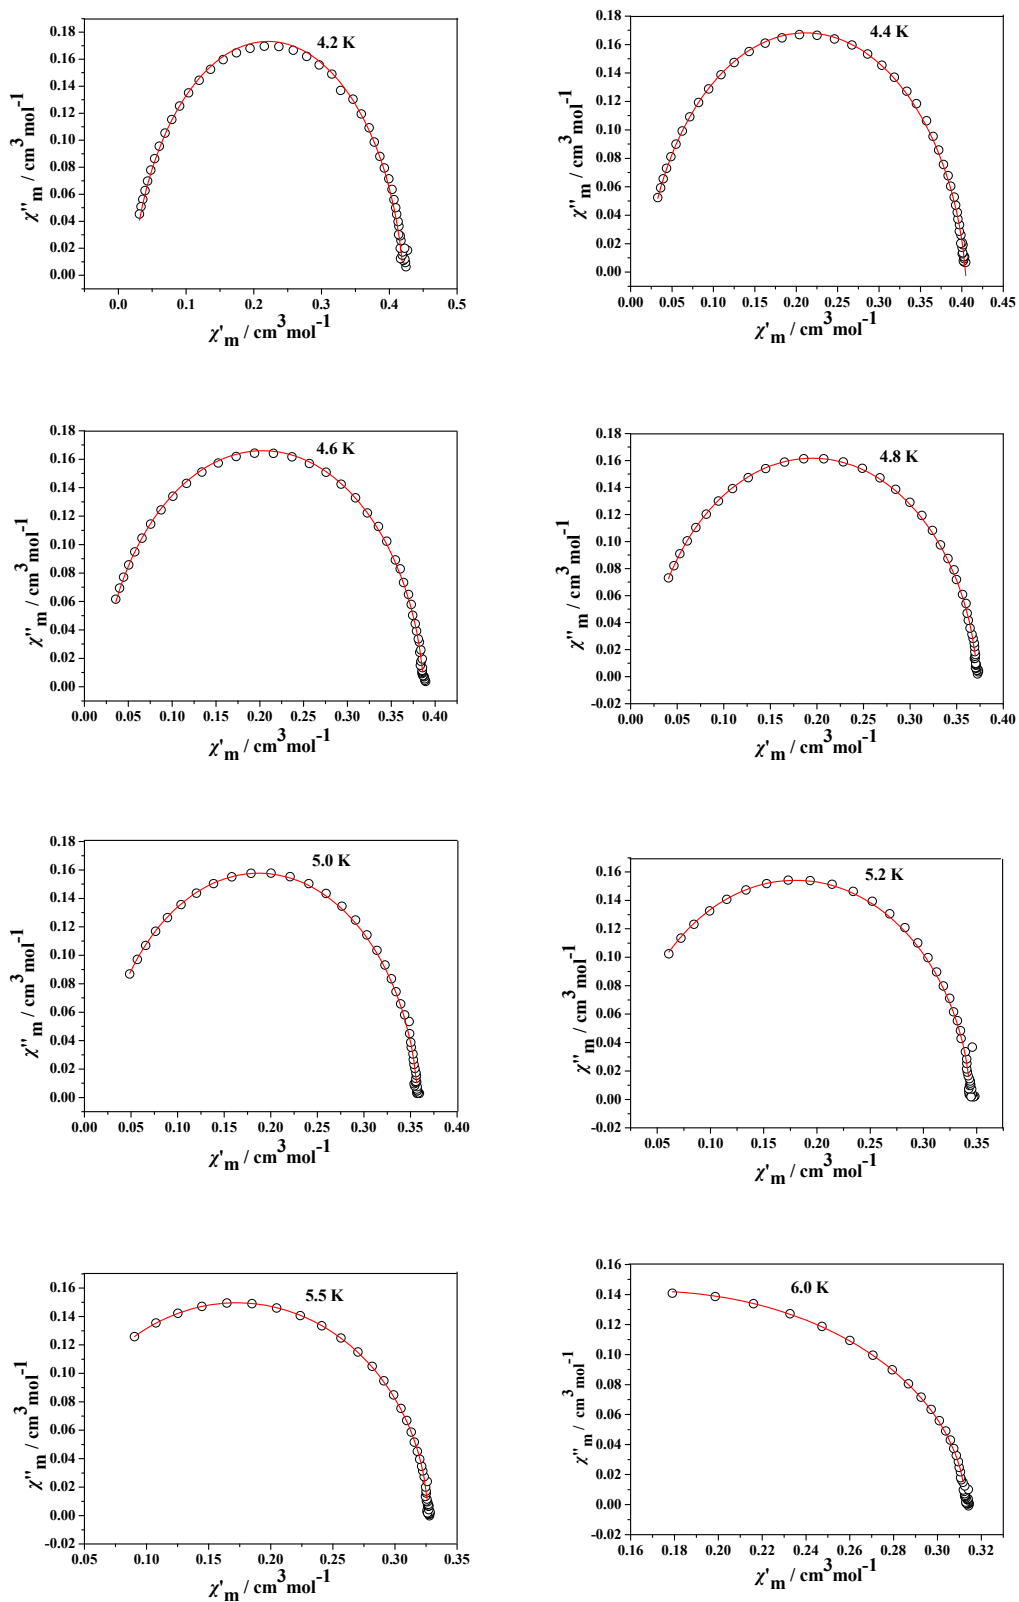

**Fig. S10** Simulations of dynamical susceptibility  $\chi(\omega)$  ranging from 2.0 to 10 K in a Cole-Cole diagram of **1**. Red lines were performed using the sum of two modified Debye functions with the fitting parameters in Table S3. The magnetic susceptibility data were described by the modified Debye functions:

$$\chi'(\omega) = \chi_s + (\chi_T - \chi_s) \frac{1 + (\omega\tau)^{1-\alpha} \sin(\frac{\pi}{2}\alpha)}{1 + 2(\omega\tau)^{1-\alpha} \sin(\frac{\pi}{2}\alpha) + (\omega\tau)^{(2-2\alpha)}}$$

$$\chi''(\omega) = (\chi_T - \chi_s) \frac{(\omega\tau)^{1-\alpha} \cos(\frac{\pi}{2}\alpha)}{1 + 2(\omega\tau)^{1-\alpha} \sin(\frac{\pi}{2}\alpha) + (\omega\tau)^{(2-2\alpha)}}$$

$$\chi''_{\omega=\tau^{-1}} = (\chi_T - \chi_s) \frac{\cos(\frac{\pi}{2}\alpha)}{2 + 2\sin(\frac{\pi}{2}\alpha)} = \frac{1}{2}(\chi_T - \chi_s) \tan \frac{\pi}{4}(1 - \alpha)$$

**Table S4** Relaxation fitting parameters from Least-Squares Fitting of  $\chi(\omega)$  data of **1**.

| $T(K)$ | $\Delta\chi_1$ (cm <sup>3</sup> mol <sup>-1</sup> ) | $\Delta\chi_2$ (cm <sup>3</sup> mol <sup>-1</sup> ) | $\alpha$ |
|--------|-----------------------------------------------------|-----------------------------------------------------|----------|
| 2.5    | 0.70081                                             | 0.01876                                             | 0.24212  |
| 2.6    | 0.67483                                             | 0.01803                                             | 0.23874  |
| 2.7    | 0.66576                                             | 0.01710                                             | 0.23865  |
| 2.8    | 0.63165                                             | 0.01707                                             | 0.222928 |
| 3.0    | 0.61445                                             | 0.0192                                              | 0.21988  |
| 3.2    | 0.55446                                             | 0.01619                                             | 0.20775  |
| 3.4    | 0.52286                                             | 0.01567                                             | 0.1948   |
| 3.6    | 0.49155                                             | 0.01698                                             | 0.16789  |
| 3.8    | 0.4667                                              | 0.01744                                             | 0.14765  |
| 4.0    | 0.44441                                             | 0.0174                                              | 0.12918  |
| 4.2    | 0.42073                                             | 0.021                                               | 0.09091  |
| 4.4    | 0.40442                                             | 0.01808                                             | 0.08787  |
| 4.6    | 0.38717                                             | 0.01921                                             | 0.06538  |
| 4.8    | 0.37216                                             | 0.01766                                             | 0.05825  |
| 5.0    | 0.35767                                             | 0.01635                                             | 0.05009  |
| 5.2    | 0.34442                                             | 0.01505                                             | 0.04209  |
| 5.5    | 0.32656                                             | 0.0184                                              | 0.01864  |
| 6.0    | 0.31283                                             | 0.02186                                             | 0.01387  |

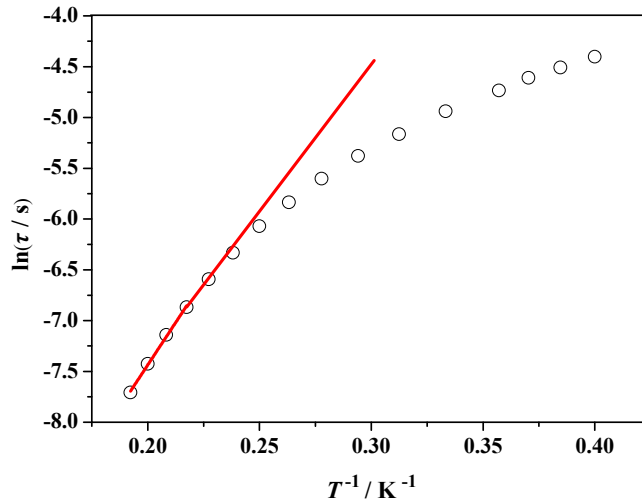

**Fig.S11** Relaxation time of the magnetization  $\ln(\tau)$  vs  $T^{-1}$  plot under the 1.5 KOe applied field for **1**.

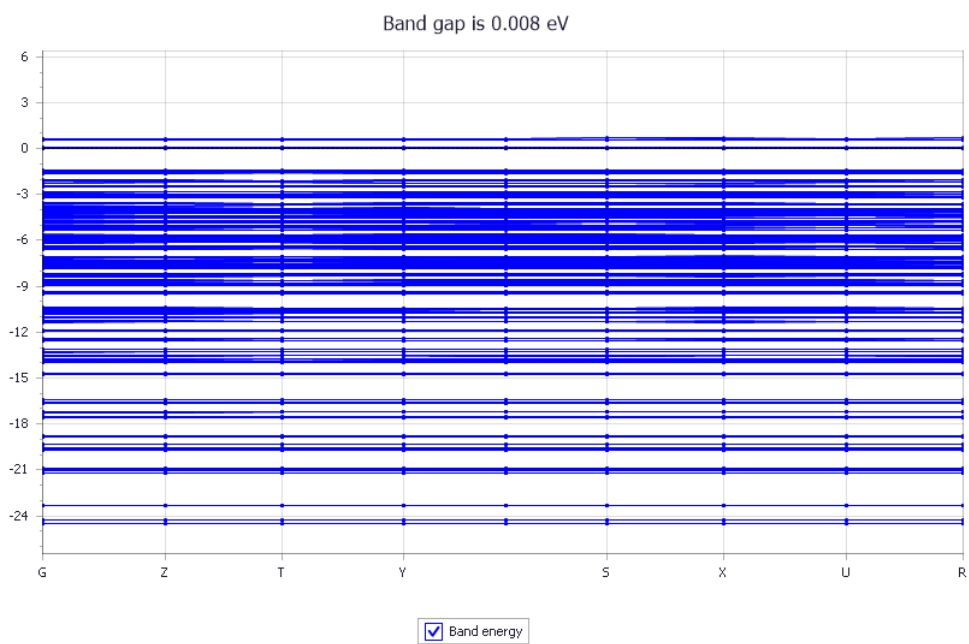

**Fig. S12** The simulated band gap of compound **1**, the calculated value is 0.008 eV. (The Fermi level is set at 0 eV).

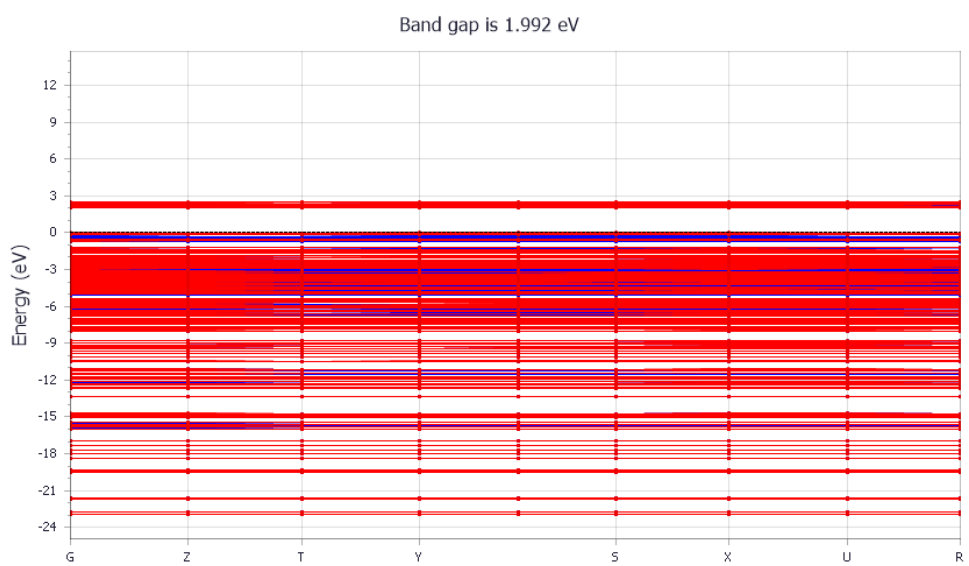

**Fig. S13** The simulated band gap of compound **2**, the calculated value is 1.992 eV. (The Fermi level is set at 0 eV).
